# Supplementary material for: Advantages of a fast-scanning quadrupole for LA-ICP-MS analysis of fluid inclusions
Source: Royal Society of Chemistry journal article supplement (doi:10.1039/d1ja00193k), 2021-01-01
Supplement: d1ja00193k1.xlsx [file d1ja00193k1.xlsx]

## Sheet: Table 1 - sample KMP-1
Electronic Supplementary Material (table 1) : elemental concentration, 1 SE uncertainty and limits of detection in individual fluid inclusions of sample KMP-1 analysed in this study (only elements for which at least 3 inclusions returned values above the limit of detection are shown, except Au in order to report limits of detection discussed in text)
Concentrations		Li	B	Na	Al	S	Cl	K	Mn	Cu	Zn	As	Br	Rb	Sr	Sb	Cs	Ba	W	Au	Tl	Pb
File	FI number	(µg/g)	(µg/g)	(µg/g)	(µg/g)	(µg/g)	(µg/g)	(µg/g)	(µg/g)	(µg/g)	(µg/g)	(µg/g)	(µg/g)	(µg/g)	(µg/g)	(µg/g)	(µg/g)	(µg/g)	(µg/g)	(µg/g)	(µg/g)	(µg/g)
180309-a04	KMP-1	<LOD	<LOD	28575.9	<LOD	<LOD	<LOD	10678.9	<LOD	69.1605	<LOD	<LOD	<LOD	54.3898	126.677	<LOD	<LOD	75.5834	<LOD	<LOD	<LOD	50.5084
180309-a05	KMP-2	<LOD	<LOD	29477.5	<LOD	<LOD	<LOD	9476.78	<LOD	112.88	<LOD	<LOD	<LOD	55.4876	134.681	<LOD	<LOD	116.693	<LOD	<LOD	<LOD	67.0256
180309-a06	KMP-3	270.134	<LOD	29430	<LOD	<LOD	<LOD	9540.07	<LOD	95.5169	<LOD	<LOD	<LOD	56.7768	174.767	<LOD	11.296	109.163	<LOD	<LOD	<LOD	23.3432
180309-a07	KMP-4	247.612	<LOD	30943.3	299.175	<LOD	54866.8	8845.83	697.708	49.2823	<LOD	46.0348	<LOD	108.347	105.042	<LOD	10.9999	<LOD	10.4173	<LOD	<LOD	32.4323
180309-a08	KMP-5	176.399	<LOD	29039.5	274.207	<LOD	30142	10060.7	745.974	55.862	<LOD	45.8694	<LOD	54.1177	134.879	<LOD	13.4566	72.5337	<LOD	<LOD	<LOD	40.2233
180309-a09	KMP-6	231.891	279.12	28008.5	94.129	1043.07	48407.9	11435.3	747.432	82.2284	<LOD	34.0089	80.335	41.9498	112.012	<LOD	8.2287	93.0181	5.59604	<LOD	<LOD	36.6392
180309-a10	KMP-7	278.689	178.97	28796	<LOD	2301.47	60609.2	10385.4	655.504	22.8716	<LOD	42.3977	<LOD	48.1623	110.56	3.7963	9.50575	79.0915	5.65006	<LOD	0.877359	35.9031
180309-a11	KMP-8	201.941	<LOD	28614.9	<LOD	4056.17	49003.4	10626.8	430.609	58.6642	<LOD	48.1342	<LOD	51.3279	94.9429	<LOD	7.65082	99.4997	<LOD	<LOD	<LOD	38.6984
180309-a12	KMP-9	208.103	<LOD	28587.8	122.117	<LOD	50268.1	10663	770.84	42.7637	<LOD	50.8587	402.828	42.5559	107.202	<LOD	9.86902	97.7191	9.89388	<LOD	<LOD	43.5574
180309-a13	KMP-10	200.987	<LOD	30162	<LOD	<LOD	61026	8564.18	<LOD	<LOD	<LOD	<LOD	<LOD	60.0692	79.6771	<LOD	11.6735	103.865	<LOD	<LOD	<LOD	66.1225
180309-a14	KMP-11	183.922	<LOD	28114.2	<LOD	<LOD	58571.4	11099.7	<LOD	<LOD	<LOD	<LOD	<LOD	106.543	205.516	<LOD	11.7296	<LOD	<LOD	<LOD	<LOD	74.7568
180309-a15	KMP-12	<LOD	<LOD	29889.6	<LOD	<LOD	<LOD	8574.93	<LOD	<LOD	<LOD	<LOD	<LOD	<LOD	145.096	<LOD	<LOD	<LOD	<LOD	<LOD	<LOD	68.6207
180309-a16	KMP-13	<LOD	<LOD	29496.7	<LOD	<LOD	<LOD	9451.25	<LOD	<LOD	<LOD	<LOD	<LOD	81.6962	183.922	<LOD	<LOD	<LOD	<LOD	<LOD	<LOD	<LOD
180309-a17	KMP-14	<LOD	<LOD	29491.6	<LOD	<LOD	<LOD	9457.94	<LOD	<LOD	<LOD	<LOD	<LOD	94.0043	178.432	<LOD	<LOD	<LOD	<LOD	<LOD	<LOD	<LOD
180309-a18	KMP-15	257.947	<LOD	28864.8	<LOD	<LOD	67321.1	10293.6	<LOD	<LOD	<LOD	<LOD	<LOD	98.4112	164.83	<LOD	17.4881	114.289	<LOD	<LOD	<LOD	23.0025
180309-a21	KMP-16	213.861	257.387	32780.8	<LOD	19035.9	60483.5	10145.5	885.569	108.224	<LOD	52.5174	<LOD	58.1978	122.342	<LOD	11.4599	81.2763	<LOD	<LOD	<LOD	59.5042
180309-a22	KMP-17	322.913	<LOD	32855.2	3391.57	<LOD	65517.4	9947.09	871.651	57.5748	<LOD	59.6924	1294.92	42.7991	166.862	<LOD	10.8882	<LOD	<LOD	<LOD	<LOD	97.7462
180309-a23	KMP-18	305.106	<LOD	32588.9	<LOD	<LOD	<LOD	10657.4	<LOD	<LOD	<LOD	<LOD	<LOD	73.5349	215.15	<LOD	<LOD	114.074	<LOD	<LOD	<LOD	47.3228
180309-a24	KMP-19	206.862	<LOD	32600.1	450.763	<LOD	<LOD	10627.5	<LOD	<LOD	<LOD	<LOD	<LOD	81.2218	151.622	<LOD	<LOD	122.155	<LOD	<LOD	<LOD	39.3341
180309-a26	KMP-20	305.512	<LOD	32755.3	<LOD	<LOD	<LOD	10213.7	731.386	<LOD	<LOD	<LOD	<LOD	86.7893	208.299	<LOD	7.64773	44.7873	<LOD	<LOD	<LOD	29.7289
180309-a28	KMP-21	261.393	304.833	32644.2	150.152	<LOD	<LOD	10509.8	705.068	20.3335	31	55.3987	<LOD	86.1461	182.575	<LOD	12.2151	53.8701	3.93217	<LOD	<LOD	29.3923
180309-a29	KMP-22	277.988	234.41	34599.6	<LOD	<LOD	57322.4	10595.8	506.083	66.6212	27	57.6718	<LOD	65.6772	121.698	<LOD	10.8093	95.9694	<LOD	<LOD	<LOD	54.634
180309-a30	KMP-23	214.469	266.552	32805.6	<LOD	5520.25	45750.4	10079.6	491.544	<LOD	56	61.4415	<LOD	88.0722	215.351	<LOD	19.601	39.9716	<LOD	<LOD	<LOD	29.7024
180309-a31	KMP-24	201.802	219.33	31553.4	44.7503	<LOD	35364.3	13418.4	553.247	19.1273	25	36.9375	<LOD	82.9368	168.676	<LOD	8.74135	51.0599	<LOD	<LOD	<LOD	19.5537
180309-a31 - 2	KMP-25	200.954	258.045	32688.1	<LOD	1286.95	59476.7	10392.6	<LOD	<LOD	17	43.5683	74.6882	112.97	178.815	3.86829	16.173	<LOD	1.97383	<LOD	<LOD	43.0247
180309-a31 - 3	KMP-26	192.258	<LOD	32835.2	<LOD	23683.2	54543.6	10000.6	<LOD	<LOD	138	70.2463	98.0973	111.573	190.011	<LOD	14.6481	<LOD	<LOD	<LOD	1.00358	<LOD
180309-a32	KMP-27	232.143	<LOD	31547	<LOD	21208.5	53102.2	13435.5	490.72	99.104	432	<LOD	<LOD	107.158	134.888	<LOD	<LOD	<LOD	<LOD	<LOD	<LOD	39.8804
180309-a33	KMP-28	365.46	<LOD	32795.8	1227.83	<LOD	<LOD	10105.5	<LOD	<LOD	501	<LOD	<LOD	95.3179	257.15	<LOD	<LOD	<LOD	<LOD	<LOD	<LOD	<LOD
180309-a34	KMP-29	<LOD	<LOD	32711.7	617.033	<LOD	58560.2	10329.9	<LOD	<LOD	440	<LOD	<LOD	141.957	304.268	<LOD	<LOD	<LOD	<LOD	<LOD	<LOD	<LOD
180309-a35	KMP-30	170.44	<LOD	33259.4	<LOD	<LOD	56997.5	8869.55	902.335	50.272	83	36.387	<LOD	40.3952	95.5369	<LOD	6.41485	84.338	<LOD	<LOD	<LOD	26.5751
180309-a36	KMP-31	231.825	<LOD	33511.6	<LOD	<LOD	46017.1	9197.04	752.026	50.6608	118	45.2403	<LOD	92.7849	110.787	<LOD	8.54285	43.2431	13.3261	<LOD	<LOD	41.0344
180309-a36 - 2	KMP-32	317.836	<LOD	32971.3	<LOD	<LOD	<LOD	9637.52	<LOD	<LOD	470	<LOD	<LOD	139.791	195.43	<LOD	18.0253	<LOD	<LOD	<LOD	<LOD	<LOD
180309-a37	KMP-33	313.657	<LOD	32701	184.379	<LOD	41716.8	10358.4	974.416	102.798	<LOD	31.5728	<LOD	43.2146	183.991	<LOD	8.86373	67.2804	<LOD	<LOD	<LOD	45.9677
180309-a38	KMP-34	206.136	256.365	32346.8	<LOD	<LOD	64168.4	11302.9	838.601	34.8703	<LOD	34.3114	163.718	57.3211	158.42	4.04227	13.127	86.1588	<LOD	<LOD	<LOD	34.4696
180309-a39	KMP-35	254.127	202.019	32248.3	238.968	<LOD	47784.6	11565.3	760.633	49.7427	24.6014	41.6874	31.9467	62.3516	90.7406	1.76851	11.5785	57.9612	7.19758	<LOD	0.288462	69.5036
180309-a41	KMP-36	329.128	<LOD	32401.4	<LOD	<LOD	62454.6	11157.2	<LOD	112.95	<LOD	73.7487	<LOD	86.7421	143.035	<LOD	17.6908	81.1507	<LOD	<LOD	<LOD	32.6093
180309-a41 - 2	KMP-37	183.397	<LOD	32567.4	<LOD	<LOD	55184.3	10714.6	928.32	79.5731	<LOD	67.5814	<LOD	102.998	157.475	<LOD	12.8746	<LOD	9.26057	<LOD	<LOD	24.7415
180309-a42	KMP-38	<LOD	<LOD	32836.3	<LOD	<LOD	42357.8	9997.54	<LOD	<LOD	<LOD	<LOD	<LOD	41.065	133.948	<LOD	15.631	<LOD	<LOD	<LOD	<LOD	44.1522
180309-a43	KMP-39	199.385	213.388	33383.1	138.302	<LOD	46678.9	8539.7	689.804	29.621	<LOD	<LOD	<LOD	56.8088	115.138	<LOD	5.15739	98.7821	<LOD	<LOD	<LOD	39.6155
180309-a44	KMP-40	298.648	275.536	32708.7	528.177	<LOD	22294.1	10337.8	333.623	<LOD	<LOD	43.5855	<LOD	129.348	207.778	<LOD	20.8033	<LOD	<LOD	<LOD	<LOD	9.9081
180309-a45	KMP-41	227.334	268.096	32464.4	<LOD	6195.16	67717.2	10989.1	960.38	76.4424	100.681	119.947	445.275	63.7147	164.52	<LOD	8.53795	83.4646	<LOD	<LOD	<LOD	44.4906
180309-a46	KMP-42	223.008	302.573	32503.6	<LOD	<LOD	71758.6	10884.7	531.582	27.3988	<LOD	58.3839	<LOD	100.532	181.468	<LOD	11.5716	45.2252	<LOD	<LOD	0.822211	23.7854
180309-a47	KMP-43	<LOD	<LOD	32554.2	<LOD	48469.8	89831	10749.7	<LOD	<LOD	<LOD	<LOD	<LOD	95.1982	173.567	<LOD	<LOD	<LOD	<LOD	<LOD	<LOD	<LOD
180309-a48	KMP-44	234.112	230.982	32010.8	299.55	<LOD	50180.5	12198.8	1263.46	105.429	20.4629	49.8548	<LOD	69.5057	68.7939	2.65018	11.5428	31.1248	7.63114	<LOD	0.504444	73.5684
1 SE uncertainty		Li	B	Na	Al	S	Cl	K	Mn	Cu	Zn	As	Br	Rb	Sr	Sb	Cs	Ba	W	Au	Tl	Pb
File	FI number	(µg/g)	(µg/g)	(µg/g)	(µg/g)	(µg/g)	(µg/g)	(µg/g)	(µg/g)	(µg/g)	(µg/g)	(µg/g)	(µg/g)	(µg/g)	(µg/g)	(µg/g)	(µg/g)	(µg/g)	(µg/g)	(µg/g)	(µg/g)	(µg/g)
180309-a04	KMP-1	<LOD	<LOD	235.436	<LOD	<LOD	<LOD	179.782	<LOD	31.1461	<LOD	<LOD	<LOD	15.1208	18.423	<LOD	<LOD	33.8011	<LOD	<LOD	<LOD	13.3362
180309-a05	KMP-2	<LOD	<LOD	190.454	<LOD	<LOD	12202.8	134.002	<LOD	32.9117	<LOD	<LOD	<LOD	10.1923	15.5346	<LOD	<LOD	33.6856	<LOD	<LOD	<LOD	10.2485
180309-a06	KMP-3	106.006	<LOD	215.73	245.374	<LOD	<LOD	194.85	<LOD	29.2893	<LOD	<LOD	<LOD	12.6732	18.5633	<LOD	5.61932	34.9213	<LOD	<LOD	<LOD	11.0995
180309-a07	KMP-4	17.9488	<LOD	140.921	49.7396	<LOD	2490.17	69.2833	10.3001	23.215	27.3936	11.0235	<LOD	7.87672	8.28483	<LOD	2.1946	<LOD	<LOD	<LOD	<LOD	4.51756
180309-a08	KMP-5	20.2741	<LOD	116.434	45.97	<LOD	3514.18	70.1187	12.4212	12.8193	<LOD	10.6636	<LOD	6.18941	9.36815	<LOD	2.2998	17.4783	<LOD	<LOD	<LOD	4.74594
180309-a09	KMP-6	7.24415	19.4099	51.1479	12.3988	354.491	983.612	32.3536	3.9657	6.60772	<LOD	4.60627	19.6941	2.46766	3.81952	<LOD	0.797867	8.44318	1.37046	<LOD	<LOD	2.01555
180309-a10	KMP-7	9.82704	22.1952	61.1107	<LOD	474.276	1307.65	36.4282	5.39368	4.35689	<LOD	5.89577	<LOD	3.10677	4.47089	1.36449	1.02223	9.24361	1.60393	<LOD	0.337177	2.4259
180309-a11	KMP-8	20.1787	<LOD	139.192	<LOD	1259.46	2995.66	84.6293	9.38844	14.9998	<LOD	14.0749	<LOD	7.36671	9.48122	<LOD	2.10584	23.6841	<LOD	<LOD	<LOD	5.58303
180309-a12	KMP-9	25.3383	<LOD	150.372	53.2662	<LOD	4006.23	92.9826	14.2319	14.2613	<LOD	16.2395	111.981	7.18278	10.9097	<LOD	2.65073	25.2294	5.48382	<LOD	<LOD	6.38491
180309-a13	KMP-10	49.0011	<LOD	329.182	<LOD	<LOD	8191.04	178.279	<LOD	<LOD	<LOD	<LOD	<LOD	18.3358	20.0599	<LOD	5.97147	66.4319	<LOD	<LOD	<LOD	16.7304
180309-a14	KMP-11	48.1362	<LOD	273.471	<LOD	<LOD	8492.61	178.42	<LOD	<LOD	<LOD	<LOD	<LOD	20.0217	27.7601	<LOD	5.42085	<LOD	<LOD	<LOD	<LOD	15.7583
180309-a15	KMP-12	<LOD	<LOD	618.348	<LOD	<LOD	<LOD	423.318	<LOD	<LOD	<LOD	<LOD	<LOD	<LOD	65.5308	<LOD	<LOD	<LOD	<LOD	<LOD	<LOD	38.8191
180309-a16	KMP-13	<LOD	<LOD	424.221	<LOD	<LOD	<LOD	283.264	<LOD	<LOD	<LOD	<LOD	<LOD	27.7074	39.3953	<LOD	<LOD	<LOD	<LOD	<LOD	<LOD	<LOD
180309-a17	KMP-14	<LOD	<LOD	328.853	190.676	<LOD	<LOD	203.879	<LOD	<LOD	<LOD	<LOD	<LOD	24.0443	30.232	<LOD	<LOD	<LOD	<LOD	<LOD	<LOD	<LOD
180309-a18	KMP-15	55.5875	<LOD	204.944	<LOD	<LOD	8741.62	130.559	<LOD	<LOD	<LOD	<LOD	<LOD	15.0564	18.3246	<LOD	4.70367	38.5406	<LOD	<LOD	<LOD	7.23342
180309-a21	KMP-16	20.8643	74.1793	94.2392	<LOD	1660.9	3136.96	54.582	10.9957	13.1619	<LOD	12.2346	<LOD	5.00449	6.94	<LOD	1.68352	14.3355	<LOD	<LOD	<LOD	4.34674
180309-a22	KMP-17	41.0438	<LOD	211.423	157.811	<LOD	6209.64	116.739	20.8049	22.2741	<LOD	<LOD	163.166	9.66935	17.7313	<LOD	3.6198	<LOD	<LOD	<LOD	<LOD	17.5841
180309-a23	KMP-18	101.197	<LOD	284.595	<LOD	<LOD	<LOD	198.684	<LOD	<LOD	<LOD	<LOD	<LOD	17.8008	26.9968	<LOD	<LOD	53.2728	<LOD	<LOD	<LOD	13.5841
180309-a24	KMP-19	71.4342	<LOD	288.511	165.521	<LOD	<LOD	178.467	<LOD	<LOD	<LOD	<LOD	<LOD	18.0229	23.5517	<LOD	<LOD	63.4275	<LOD	<LOD	<LOD	12.1254
180309-a26	KMP-20	42.1335	<LOD	156.533	145.17	<LOD	<LOD	95.4392	22.7247	<LOD	<LOD	<LOD	<LOD	9.90956	14.9264	<LOD	2.62188	12.3933	<LOD	<LOD	<LOD	5.0771
180309-a28	KMP-21	16.8904	77.4408	59.9574	36.675	<LOD	<LOD	38.9582	10.364	5.88937	<LOD	10.1648	<LOD	3.94302	5.36523	<LOD	1.21468	8.43818	1.63304	<LOD	<LOD	2.2708
180309-a29	KMP-22	9.94894	23.6927	87.4027	<LOD	<LOD	1376.73	34.1395	5.21562	9.11241	<LOD	7.30507	<LOD	2.82271	4.38076	<LOD	1.00166	9.48138	<LOD	<LOD	<LOD	2.64206
180309-a30	KMP-23	18.2291	60.5275	118.902	<LOD	1272.34	2807.73	66.5379	9.35192	<LOD	<LOD	12.926	<LOD	7.68322	11.4987	<LOD	2.7635	12.0075	<LOD	<LOD	<LOD	4.08225
180309-a31	KMP-24	8.63628	21.6256	77.0778	16.3764	<LOD	1304.86	40.9345	4.19614	3.78732	<LOD	5.39203	<LOD	4.05978	5.52688	<LOD	0.972069	7.42247	<LOD	<LOD	<LOD	1.70537
180309-a31 - 2	KMP-25	7.86877	18.2503	68.6954	<LOD	266.928	1168.65	38.319	<LOD	<LOD	<LOD	5.72695	16.8461	5.04741	6.07503	1.3714	1.40507	<LOD	1.00082	<LOD	<LOD	0.723343
180309-a31 - 3	KMP-26	26.9894	<LOD	163.787	<LOD	2286.8	5676.96	92.6627	<LOD	<LOD	<LOD	19.2649	43.5495	12.957	14.8989	<LOD	3.22628	<LOD	<LOD	<LOD	1.67911	<LOD
180309-a32	KMP-27	90.6682	<LOD	367.027	<LOD	7395.47	16462.6	249.158	50.4607	59.865	<LOD	<LOD	<LOD	31.3391	29.3791	<LOD	<LOD	<LOD	<LOD	<LOD	<LOD	14.4343
180309-a33	KMP-28	116.05	<LOD	455.595	325.066	<LOD	<LOD	268.584	<LOD	<LOD	<LOD	<LOD	<LOD	30.9883	48.2645	<LOD	<LOD	<LOD	<LOD	<LOD	<LOD	<LOD
180309-a34	KMP-29	<LOD	<LOD	410.292	211.237	<LOD	14286.3	241.336	<LOD	<LOD	<LOD	<LOD	<LOD	33.808	47.3308	<LOD	<LOD	<LOD	<LOD	<LOD	<LOD	<LOD
180309-a35	KMP-30	21.2551	<LOD	167.947	<LOD	<LOD	3813.05	87.3649	14.0184	15.9689	<LOD	13.4992	<LOD	7.38488	10.8014	<LOD	2.03649	24.7718	<LOD	<LOD	<LOD	5.1356
180309-a36	KMP-31	33.1624	<LOD	197.408	<LOD	<LOD	5293.6	100.126	16.5605	20.7679	<LOD	19.5204	<LOD	13.1122	13.6053	<LOD	2.96393	22.4433	9.13205	<LOD	<LOD	7.54711
180309-a36 - 2	KMP-32	101.841	<LOD	365.291	<LOD	<LOD	<LOD	219.193	<LOD	<LOD	<LOD	<LOD	<LOD	29.8936	33.751	<LOD	8.38357	<LOD	<LOD	<LOD	<LOD	<LOD
180309-a37	KMP-33	32.1323	<LOD	147.264	72.0783	<LOD	5440.89	88.0816	18.8967	21.6162	<LOD	16.3209	<LOD	6.90973	13.3333	<LOD	2.3522	20.657	<LOD	<LOD	<LOD	5.94314
180309-a38	KMP-34	9.11773	20.9405	62.5548	<LOD	<LOD	1346.36	36.8754	4.80192	4.88185	<LOD	5.079	26.3549	3.30721	5.25555	1.33634	1.16079	9.42065	<LOD	<LOD	<LOD	2.23133
180309-a39	KMP-35	4.55141	10.8088	24.8449	11.5799	<LOD	818.565	14.9947	2.43988	2.33997	3.87034	2.66559	15.5146	1.37172	1.39578	0.768956	0.440106	3.08683	0.689794	<LOD	0.0948486	1.25407
180309-a41	KMP-36	36.6185	<LOD	167.636	130.295	<LOD	6542.11	103.845	<LOD	24.16	<LOD	20.2722	<LOD	11.1101	13.5984	<LOD	3.74773	24.1344	<LOD	<LOD	<LOD	5.80731
180309-a41 - 2	KMP-37	34.6421	<LOD	170.165	<LOD	<LOD	5913.09	101.845	20.5699	19.7229	<LOD	19.1197	<LOD	12.084	14.2196	<LOD	3.10361	<LOD	5.34645	<LOD	<LOD	5.06892
180309-a42	KMP-38	<LOD	<LOD	307.92	<LOD	<LOD	15980	193.394	<LOD	<LOD	<LOD	<LOD	<LOD	14.1236	23.8425	<LOD	6.41751	<LOD	<LOD	<LOD	<LOD	12.5366
180309-a43	KMP-39	29.0802	68.6815	153.357	76.8807	<LOD	4260.72	78.9842	13.058	11.5244	<LOD	<LOD	<LOD	7.95805	10.8813	<LOD	1.80042	24.5136	<LOD	<LOD	<LOD	5.76369
180309-a44	KMP-40	23.8655	71.4832	124.994	56.2268	<LOD	4083.21	72.209	10.8151	<LOD	<LOD	13.7961	<LOD	12.0586	12.0865	<LOD	3.66999	<LOD	<LOD	<LOD	<LOD	2.78611
180309-a45	KMP-41	27.6341	72.226	147.333	<LOD	1755.46	4855.76	87.0328	14.0471	17.4266	33.0958	21.2344	103.589	8.26667	12.6733	<LOD	2.20437	21.8663	<LOD	<LOD	<LOD	6.49703
180309-a46	KMP-42	13.8438	34.6103	83.0009	<LOD	<LOD	2235.86	48.415	6.11523	3.81715	<LOD	8.57419	<LOD	5.79848	7.46612	<LOD	1.46076	5.40409	<LOD	<LOD	0.395899	2.47276
180309-a47	KMP-43	<LOD	<LOD	471.585	<LOD	15373.8	34557.3	314.388	<LOD	<LOD	<LOD	<LOD	<LOD	32.7868	41.5083	<LOD	<LOD	<LOD	<LOD	<LOD	<LOD	<LOD
180309-a48	KMP-44	6.71052	18.7485	37.7328	17.0177	<LOD	1117.75	23.6845	3.96175	5.22465	6.41178	3.97884	<LOD	2.21307	2.14024	0.990374	0.676862	4.44917	1.13152	<LOD	0.170207	1.95823
Limits of detection		Li	B	Na	Al	S	Cl	K	Mn	Cu	Zn	As	Br	Rb	Sr	Sb	Cs	Ba	W	Au	Tl	Pb
File	FI number	(µg/g)	(µg/g)	(µg/g)	(µg/g)	(µg/g)	(µg/g)	(µg/g)	(µg/g)	(µg/g)	(µg/g)	(µg/g)	(µg/g)	(µg/g)	(µg/g)	(µg/g)	(µg/g)	(µg/g)	(µg/g)	(µg/g)	(µg/g)	(µg/g)
180309-a04	KMP-1	179.289	1141.3	107.88	403.765	20176	35500.6	269.155	1262.94	61.5551	420.847	126.411	1178.69	14.6897	22.3522	73.6957	9.49943	40.9641	17.2148	7.5215	8.20939	19.9513
180309-a05	KMP-2	194.938	1236.19	111.962	428.03	21891.4	37912.5	286.42	1388.6	89.1935	341.831	110.737	1267.92	15.2204	17.5503	44.8057	9.46844	26.3519	11.0569	6.68122	11.8327	17.3064
180309-a06	KMP-3	172.84	1052.8	103.08	361.195	18692.9	32922.8	247.766	1170.06	87.2699	367.758	94.0225	1085.81	22.1619	14.3274	54.8161	9.40884	75.0158	26.1291	5.80268	10.4726	17.6
180309-a07	KMP-4	27.2775	159.252	15.1296	56.1679	2786.97	4909.73	36.5741	193.105	17.1667	65.7097	22.4159	161.377	4.67429	3.68798	13.0547	2.37918	14.2252	9.12278	0.959946	2.04554	3.10477
180309-a08	KMP-5	33.7768	216.777	20.3819	74.2589	3833.44	6735.99	50.8756	255.486	20.7419	84.1864	22.3273	231.484	4.24501	3.835	10.5761	2.29263	22.6841	7.29287	1.35973	1.82017	4.14943
180309-a09	KMP-6	7.61452	44.8627	4.47337	15.8749	811.259	1388	10.7097	50.4672	3.75284	15.2367	4.60901	48.4517	0.920097	0.628875	2.22366	0.444246	4.40015	1.55123	0.29774	0.21632	0.698181
180309-a10	KMP-7	11.1798	66.4016	6.17984	22.6259	1188	2079.05	15.6719	74.0021	6.21823	24.7362	7.757	66.9	1.12495	0.862824	3.5424	0.514889	6.72844	1.20225	0.356778	0.698682	1.17807
180309-a11	KMP-8	33.7161	188.808	19.1038	68.2343	3481.25	6047.9	46.6109	246.982	20.5094	72.2153	27.3131	209.274	4.58677	5.08361	13.8723	2.19773	26.7122	6.28594	1.29901	1.56751	3.77607
180309-a12	KMP-9	48.2711	273.441	25.1537	99.9563	5032.97	8912.13	67.2352	332.686	25.2697	106.356	28.819	301.188	5.79261	5.25116	18.3484	3.43172	17.6524	7.32531	2.51847	2.80849	4.38596
180309-a13	KMP-10	112.185	630.521	63.7525	232.82	11181.9	19782.7	149.791	858.259	70.0805	289.573	99.9398	714.939	14.9756	20.1728	50.9849	10.8577	108.003	33.326	6.00795	8.30563	17.4705
180309-a14	KMP-11	128.163	685.124	70.7096	260.836	12734.5	21847	171.645	936.77	64.1663	277.82	93.2711	755.719	18.4197	13.9036	51.9081	9.21693	91.7801	24.6069	5.58042	8.48427	13.9266
180309-a15	KMP-12	667.97	3635.54	367.124	1322.78	67336.2	116974	896.768	4516.78	340.547	1592.33	535.236	4245.84	84.4365	76.7431	270.584	49.5064	493.509	166.677	29.2298	41.5159	63.793
180309-a16	KMP-13	374.169	2057.16	209.643	774.981	38671.2	66965.3	512.871	2555.32	231.909	741.755	236.026	2332.81	50.5035	41.6876	123.254	24.7424	214.073	101.809	15.0295	21.9795	52.2137
180309-a17	KMP-14	204.68	1115.69	112.605	417.05	20821.2	37005.9	280.959	1399.33	107.264	460.491	144.656	1259.67	27.3135	26.5732	66.8964	14.7463	135.337	55.7134	7.56663	8.40635	26.3861
180309-a18	KMP-15	110.277	594.557	62.0769	224.026	11393.2	19584	151.228	753.274	56.4939	209.074	71.811	656.66	11.5035	10.4828	30.0412	6.21036	68.7213	25.5271	4.01279	7.02914	12.2491
180309-a21	KMP-16	46.3454	252.237	27.7031	92.179	4819.12	8400.96	64.7789	316.133	13.2818	101.305	29.2014	280.872	4.4398	4.05132	14.231	2.66771	31.3892	9.83344	1.49752	2.42723	2.86197
180309-a22	KMP-17	70.6236	370.362	42.5197	137.783	6923.96	12467.7	92.8611	487.8	44.2224	147.612	56.5514	414.718	8.05869	7.35597	26.6329	5.91002	56.2339	21.6677	2.5194	5.98645	8.55122
180309-a23	KMP-18	184.792	989.479	110.887	386.439	19135	33476.4	255.278	1286.26	99.5028	391.629	111.503	1111.77	20.0495	15.6429	61.3787	10.8085	108.276	22.3509	7.03907	12.1489	23.2438
180309-a24	KMP-19	155.766	839.659	91.7902	318.122	16079.9	28479.6	215.374	1144.63	90.6844	320.847	87.5903	969.155	18.3955	18.4015	55.8759	8.68964	87.0084	44.6494	6.20029	10.0121	17.9138
180309-a26	KMP-20	68.933	373.808	39.5235	136.684	7218.6	12438.9	94.7331	466.705	34.6068	136.496	34.8052	420.426	8.5549	6.69768	19.8083	3.5366	16.7925	12.2957	2.56932	3.00934	6.34043
180309-a28	KMP-21	16.6717	91.6383	9.46608	33.329	1800.47	3199.05	23.9918	118.444	6.72679	31.272	9.26635	103.356	1.31527	1.20296	4.8447	0.574344	5.73973	1.0122	0.42899	0.57551	0.971879
180309-a29	KMP-22	12.6793	68.9069	7.27675	25.609	1294.32	2320.21	17.1658	90.7303	6.32539	26.8853	8.16803	77.2284	1.82845	1.26331	4.16526	0.84596	7.44962	3.06347	0.469136	0.745972	1.34905
180309-a30	KMP-23	26.8701	132.368	14.8883	51.3768	2629.05	4620.79	34.5447	182.395	14.7111	55.7418	17.6117	155.93	3.65914	3.12324	7.78018	1.68578	14.7743	6.07788	0.938317	1.68312	2.51405
180309-a31	KMP-24	11.1671	58.9524	6.29171	22.6786	1152.4	2093.6	15.6048	80.6385	6.06422	24.7023	6.76096	66.2894	0.760249	1.29147	2.00278	0.762417	7.60822	1.68745	0.449457	0.611777	1.29005
180309-a31 - 2	KMP-25	7.29313	38.1719	4.10321	14.7722	739.906	1347.85	10.0567	52.9646	4.30868	16.6042	4.72187	43.1215	0.610724	0.939913	2.9793	0.554874	5.53713	1.35556	0.319344	0.458315	0.916589
180309-a31 - 3	KMP-26	64.1977	341.582	36.2173	130.692	6728.26	12173.6	90.8029	461.134	32.032	138.178	36.3776	38.8346	3.44226	6.64041	23.3607	3.92014	39.1195	7.64043	2.37409	3.03934	6.81419
180309-a32	KMP-27	195.619	1027.41	111.642	409.485	20428.2	37204.5	275.192	1367.96	107.787	432.079	124.612	1254.43	17.686	30.0124	75.0293	16.8565	131.751	60.4445	7.98606	15.7972	27.8552
180309-a33	KMP-28	253.607	1251.02	133.504	493.989	24187.2	43813.1	323.494	1779.94	172.715	501.258	190.381	1426.68	43.0944	24.2736	93.8819	14.3295	142.855	58.8348	12.4041	18.6872	35.5361
180309-a34	KMP-29	212.703	1032.2	112.458	409.563	20136.1	36817.6	269.093	1490.04	127.862	440.198	134.622	1226.28	21.587	32.4182	84.7982	16.9528	168.925	47.9454	11.3727	16.8046	25.9044
180309-a35	KMP-30	43.0618	212.589	22.4041	84.2886	4275.94	7775.16	56.6728	305.529	28.5786	82.6335	32.9134	247.473	3.59006	3.29119	16.1057	3.20975	31.9677	13.176	1.40679	3.17597	5.58991
180309-a36	KMP-31	54.7537	272.231	30.2015	107.129	5381.52	9852.55	71.7107	380.029	34.5323	117.874	39.8427	310.603	8.5062	6.1498	18.2381	3.63033	40.1573	16.5576	2.1739	2.62311	6.80128
180309-a36 - 2	KMP-32	224.892	1126.72	124.17	440.815	22464.3	40901.7	298.182	1550.55	131.735	469.883	155.034	1276.28	31.8888	22.3252	69.5752	13.1789	148.033	61.0369	8.14971	8.98284	25.7584
180309-a37	KMP-33	60.6961	318.604	33.6948	125.101	6390.71	11400.1	83.218	427.297	32.2059	118.232	30.842	360.147	2.78371	5.55454	21.4113	2.76006	32.6246	11.3275	2.1582	3.23275	4.95012
180309-a38	KMP-34	10.6958	52.61	5.64263	19.9857	1082.04	1934.56	14.1502	71.1713	5.45701	21.1536	6.55463	59.3467	1.16683	0.470964	3.4153	0.632081	6.28603	2.3272	0.366979	0.622064	0.922984
180309-a39	KMP-35	4.12084	20.6174	2.2605	8.14916	428.265	760.882	5.60898	29.1908	1.86338	7.48031	2.06681	23.6624	0.233773	0.2146	1.19024	0.229177	1.25919	0.519783	0.0986856	0.158189	0.21599
180309-a41	KMP-36	65.9829	327.372	36.0497	130.632	6848.3	12492.9	88.9541	492.415	37.3824	122.789	41.7308	379.408	7.80125	6.46777	19.7209	4.57772	32.5767	15.6619	2.54518	1.94138	6.52725
180309-a41 - 2	KMP-37	59.5685	306.335	33.3227	118.103	6303.23	11420.1	82.992	450.09	42.0911	132.561	36.0257	359.874	7.85394	5.33453	21.7465	3.1489	42.2905	8.36494	2.33837	3.08233	4.82278
180309-a42	KMP-38	254.077	1257.88	131.605	504.435	26139.8	46727.9	341.013	1819.18	119.106	457.886	129.434	1457.56	25.0118	19.4848	82.1533	6.51551	150.387	26.7256	8.79442	13.2561	18.0987
180309-a43	KMP-39	42.5295	211.557	22.124	81.8414	4366.16	7909.85	57.2517	302.665	23.82	88.2119	28.8979	246.433	5.25067	4.21742	14.162	2.48943	28.2635	10.2101	1.7582	1.58145	4.99043
180309-a44	KMP-40	39.6022	202.508	22.0041	79.8087	4227.24	7848.29	55.9816	301.479	22.1134	65.4754	21.7802	237.621	4.21927	3.87976	13.8496	1.09917	19.2492	10.4892	1.19891	2.22964	3.04401
180309-a45	KMP-41	44.8735	230.193	24.9088	93.7213	4797.03	8678.25	63.2289	345.392	23.8456	83.304	22.7318	267.806	5.72334	5.26458	16.4756	1.54236	24.2417	10.0297	1.56867	2.7409	4.12298
180309-a46	KMP-42	20.127	100.379	11.092	40.7782	2149.72	3956.74	27.7784	157.158	6.90022	30.0999	12.2688	117.938	2.45786	2.0698	5.09878	0.912389	12.1022	4.45844	0.788393	0.475205	2.0195
180309-a47	KMP-43	412.984	2060.78	226.645	841.058	43110.2	78607.2	562.551	3129.84	212.05	799.603	256.944	2441.04	42.9831	25.745	145.183	31.51	231.219	62.2974	14.7303	22.6144	38.7663
180309-a48	KMP-44	7.57217	39.9048	4.1227	15.9074	846.194	1529.61	11.2306	57.8036	2.88393	13.2229	3.85909	45.1459	0.768621	0.636103	1.63142	0.375455	3.21925	0.418758	0.228232	0.314451	0.60039

## Sheet: Table 2 - sample Loww9
Electronic Supplementary Material (table 2) : elemental concentration, 1 SE uncertainty and limits of detection in individual fluid inclusions of sample Loww9 analysed in this study (only elements for which at least 3 inclusions returned values above the limit of detection are shown)
Concentrations		Li	Be	B	Na	Mg	Al	Cl	K	Ca	Ti	Mn	Fe	Cu	Zn	As	Br	Rb	Sr	Ag	Cd	Sn	Sb	Cs	Ba	La	Ce	W	Tl	Pb	Bi	U
File	FI number	(µg/g)	(µg/g)	(µg/g)	(µg/g)	(µg/g)	(µg/g)	(µg/g)	(µg/g)	(µg/g)	(µg/g)	(µg/g)	(µg/g)	(µg/g)	(µg/g)	(µg/g)	(µg/g)	(µg/g)	(µg/g)	(µg/g)	(µg/g)	(µg/g)	(µg/g)	(µg/g)	(µg/g)	(µg/g)	(µg/g)	(µg/g)	(µg/g)	(µg/g)	(µg/g)	(µg/g)
180309-c03	1	689.633	8.03616	1244.66	84775	<LOD	412.851	54935	62789.1	4436.33	<LOD	21590.5	84615.1	174.889	5465.17	79.612	1006.22	2113.5	29.382	49.2726	52.9431	560.512	119.013	2488.49	50.3055	<LOD	1.0942	74.3891	58.5376	3525.75	14.0996	<LOD
180309-c03 - 2	2	522.535	<LOD	1238.83	63429	<LOD	<LOD	54934.9	49189.2	<LOD	<LOD	17069.9	65577.4	179.879	5225.41	108.643	712.501	1758.59	20.7597	50.1709	74.5061	607.064	130.177	2149.08	31.6342	<LOD	<LOD	60.2581	53.6975	3153.85	14.3251	<LOD
180309-c04	3	712.37	6.27755	1265.33	66492	13.3835	399.113	54725.7	61624.3	2381.84	18.6475	22192.2	76851	170.483	5457.38	97.4144	740.675	2114.99	25.9032	47.1669	55.5456	533.477	120.871	2558.26	45.7462	<LOD	0.919579	75.8048	57.7819	3616.84	13.0567	0.48303
180309-c04 - 2	4	917.682	12.9989	1294.15	75616	12.8593	142.481	54726.1	65145.4	<LOD	20.7753	22680.4	81185.5	171.388	5701.98	81.646	672.852	2248.34	27.9669	40.3479	50.1036	498.766	129.083	2630.6	56.7059	0.508198	0.651111	76.2378	54.3453	3795.6	12.1787	<LOD
180309-c05	5	782.062	<LOD	1714.44	46696	<LOD	<LOD	54725.2	62284	<LOD	41.8162	28076.3	83123.5	183.287	6407.08	115.401	901.443	2276.8	22.7615	45.5267	63.6841	622.965	126.797	2809.94	47.8606	<LOD	2.00429	75.9958	61.0803	4136.59	15.2793	<LOD
180309-c06	6	502.281	9.0959	1313.95	96202	<LOD	831.873	54517.4	64355.1	<LOD	23.2667	24395.4	87626.6	171.695	5750.18	72.2988	919.642	2164.98	30.0146	50.5958	56.4226	669.013	127.206	2713.38	57.114	<LOD	1.11525	85.0417	50.8061	3838.69	12.5272	<LOD
180309-c07	7	869.718	18.6916	1386.38	72141	<LOD	807.294	54309	62764.8	<LOD	23.4051	21904.3	86086.8	167.523	5656.16	105.825	959.166	2177.83	28.5466	35.9939	31.8236	690.97	142.877	2619.45	61.484	<LOD	0.840896	66.9135	56.8349	3659.31	12.9497	<LOD
180309-c08	8	873.319	<LOD	1345.89	47780	255.47	<LOD	54100	65484.6	<LOD	<LOD	21315	88386.3	211.153	6456.3	106.153	761.273	2599.62	20.4653	57.4292	58.2649	407.307	172.487	2712.8	41.8894	<LOD	<LOD	83.0364	75.6424	4197.17	16.1674	<LOD
180309-c09	9	362.36	<LOD	1330.58	82478	736.15	<LOD	53891.3	51277.4	<LOD	<LOD	20854.4	80081.2	232.709	5957.97	112.012	<LOD	2064.16	27.0713	53.1122	<LOD	529.569	144.172	2320.35	98.5695	<LOD	<LOD	93.8792	62.3437	3641.9	11.356	<LOD
180309-c10	10	1074.01	15.1573	983.182	58719	21.8561	916.335	53682.5	53158.6	<LOD	<LOD	20525.6	79779.4	137.71	5946.76	63.6375	1206.07	2040.4	24.7434	34.0301	<LOD	410.492	104.29	2472.66	50.1509	<LOD	1.16345	49.9936	42.6633	3403.99	12.2359	0.223274
180309-c13	11	522.329	<LOD	1170.49	80857	<LOD	422.35	53473.6	58760.4	<LOD	<LOD	16293.3	65220.6	201.37	4196.25	98.3039	952.418	2231.59	21.2841	26.4001	71.6434	691.653	135.054	2007.15	61.0216	<LOD	<LOD	78.2258	40.078	3026.94	10.8183	<LOD
180309-c14	12	853.409	14.7113	1609.86	80147	<LOD	<LOD	53264	64632.2	<LOD	<LOD	21896.8	92319.3	231.743	6454.17	97.8583	714.963	2096.16	26.5983	37.714	64.0659	688.396	171.061	2764.27	64.1471	0.9835	1.98449	82.5255	66.8302	4031.61	9.04678	<LOD
180309-c15	13	434.922	<LOD	1293.89	83189	17.4869	<LOD	53264.6	51620.5	<LOD	<LOD	19391.6	81023.4	180.305	4734.53	85.937	534.628	1828	27.6112	35.0571	45.5227	441.351	106.419	2175.42	50.8716	0.791641	2.11384	67.4324	46.4798	2968.78	10.5829	<LOD
180309-c16	14	729.847	<LOD	1245.97	90250	<LOD	326.874	53054.7	55261.5	<LOD	<LOD	18458.7	76379.7	163.731	5216.68	104.886	712.02	1870.24	27.5097	54.0753	67.122	548.438	137.001	2309.95	37.0686	0.609471	<LOD	70.5621	42.7876	3209.47	10.6211	<LOD
180309-c18	16	593.922	14.4831	1309.98	55849	22.3184	234.428	52845.5	50865.6	<LOD	55.9648	20976.4	84525.4	23.3567	5969.04	<LOD	846.459	1861.25	29.6552	21.4665	43.351	687.161	<LOD	2247.78	40.6274	<LOD	0.839765	59.6396	47.3033	3402.11	1.86025	0.258147
180309-c19	17	713.449	14.2575	1143.65	79592	<LOD	247.255	52425.8	54023.5	10855.7	<LOD	18127	73054.2	138.869	4743.11	105.808	914.391	1837.3	23.4891	36.6735	<LOD	437.917	130.868	2135.7	47.7241	<LOD	1.5669	57.072	50.8867	3372.24	13.0997	<LOD
180309-c20	18	964.247	9.30705	1153.14	102044	<LOD	392.611	52216	52008.5	<LOD	<LOD	18089.7	78531.3	128.346	4916.99	81.4434	<LOD	1736.19	27.7757	35.3336	76.2002	487.571	118.422	2081.21	31.579	<LOD	2.0363	63.0328	48.5858	2902.78	9.80953	<LOD
180309-c21	19	793.818	<LOD	1022.57	78929	<LOD	357.974	51375.1	49352.1	<LOD	<LOD	16682	71568.1	150.819	5166.49	55.6955	<LOD	1704.4	24.8685	43.751	<LOD	527.416	134.107	2095.93	38.4981	<LOD	<LOD	89.1701	46.4549	3140.01	10.7714	<LOD
1 SE uncertainty		Li	Be	B	Na	Mg	Al	Cl	K	Ca	Ti	Mn	Fe	Cu	Zn	As	Br	Rb	Sr	Ag	Cd	Sn	Sb	Cs	Ba	La	Ce	W	Tl	Pb	Bi	U
File	FI number	(µg/g)	(µg/g)	(µg/g)	(µg/g)	(µg/g)	(µg/g)	(µg/g)	(µg/g)	(µg/g)	(µg/g)	(µg/g)	(µg/g)	(µg/g)	(µg/g)	(µg/g)	(µg/g)	(µg/g)	(µg/g)	(µg/g)	(µg/g)	(µg/g)	(µg/g)	(µg/g)	(µg/g)	(µg/g)	(µg/g)	(µg/g)	(µg/g)	(µg/g)	(µg/g)	(µg/g)
180309-c03	1	5.94142	1.26498	11.0724	29.3585	<LOD	15.5942	148.427	24.7968	396.847	<LOD	20.1229	282.189	3.17971	24.1864	2.24542	28.7166	5.77798	0.653213	1.50315	3.14668	8.92879	2.02718	4.66653	2.14986	<0.13905	0.127769	1.6714	0.725108	6.60494	0.332399	0.0397282
180309-c03 - 2	2	12.7882	<LOD	22.8653	43.6583	3.36686	<LOD	282.994	37.8994	939.924	<LOD	30.8019	427.894	5.56258	40.8101	4.68198	64.1453	9.05665	0.943483	2.6318	6.43537	20.2431	3.8646	7.45239	3.04799	<0.35907	0.206158	2.60311	1.19505	10.7907	0.57968	<0.2047
180309-c04	3	4.66024	0.850611	9.93624	26.665	1.81862	9.3511	141.401	25.1989	248.312	3.06514	20.9112	276.257	3.21787	24.7594	2.42079	20.0863	5.93442	0.631246	1.50267	3.31564	6.55901	2.00217	4.85503	2.07044	0.0630642	0.102303	1.72578	0.737716	6.83219	0.32805	0.0207329
180309-c04 - 2	4	5.49524	0.91038	9.15052	19.6171	1.45797	14.8837	113.295	17.9348	351.382	4.19969	14.6116	196.436	2.24252	17.6005	1.73009	24.8046	4.22144	0.455247	0.971673	2.1601	7.75524	1.60684	3.39676	1.58694	0.0524178	0.0579113	1.20128	0.493111	4.83155	0.223862	0.0152434
180309-c05	5	15.1051	1.83563	26.5891	40.8548	3.39313	<LOD	305.002	46.4755	986.422	12.586	43.0387	526.596	6.13504	49.4105	5.31438	70.0303	11.2508	1.09035	2.72791	6.41533	23.1721	4.31505	9.29757	3.85249	<0.43381	0.270028	3.17937	1.384	13.3586	0.660742	0.0618149
180309-c06	6	7.73057	1.36841	10.617	27.7634	<LOD	20.2947	143.317	22.9572	325.833	6.95263	19.366	268.864	3.29297	23.6147	2.24883	25.6173	5.47445	0.581587	1.32601	3.45138	9.58997	2.12227	4.45202	1.9658	<0.02404	0.092907	1.61064	0.639092	6.54054	0.307585	<0.013671
180309-c07	7	8.59713	1.8099	12.0705	26.5904	1.29054	23.2032	159.855	24.9637	<LOD	8.68873	20.1751	287.291	3.31522	25.1445	2.62416	32.2036	5.96086	0.645279	1.35662	2.79125	12.2638	2.35285	4.85422	2.31442	0.0977925	0.0920145	1.53992	0.714178	6.76788	0.339528	<0.073975
180309-c08	8	20.4824	3.37679	25.5868	33.2897	10.9033	<LOD	301.667	38.4447	1081.97	<LOD	30.1013	445.047	5.25617	40.2433	5.10416	80.9079	9.76093	0.8566	2.67649	4.8302	28.801	4.26217	7.41685	3.29882	<0.4477	0.379489	2.6968	1.23876	10.9962	0.522596	<0.029883
180309-c09	9	26.6397	<LOD	58.8999	91.136	40.059	<LOD	632.948	72.2534	<LOD	<LOD	62.5072	880.502	11.9434	80.8896	9.86938	184.698	18.0698	2.11556	5.47117	<LOD	46.8929	7.59945	14.2286	10.235	<1.9651	<2.2978	6.12843	2.38766	21.0261	1.09748	<0.71178
180309-c10	10	18.2782	1.29311	29.3206	29.3303	2.27337	56.3666	301.314	25.6868	1422.33	20.0374	22.118	323.203	2.95687	28.515	4.07908	92.7741	6.1645	0.875673	1.31583	8.05477	30.7882	2.71915	5.0118	3.06271	0.102709	0.116994	1.44205	0.683044	6.90355	0.370972	0.0402259
180309-c13	11	12.3462	<LOD	22.6454	50.8301	<LOD	34.1285	282.84	43.26	1009.29	<LOD	31.0419	446.538	6.2254	37.8259	4.4114	65.2899	10.6035	1.0041	2.22422	6.54039	20.7243	3.95244	7.46486	4.13271	<0.44266	0.289236	3.07588	1.05874	10.7977	0.526223	<0.19132
180309-c14	12	6.42495	1.68393	14.3689	32.9334	<LOD	<LOD	172.465	29.5026	<LOD	<LOD	23.3758	346.112	4.26911	30.3984	2.87245	35.0078	6.69523	0.724274	1.60186	4.31893	10.1416	2.71196	5.69594	2.88954	0.122154	0.167448	2.02946	0.893128	8.10309	0.319106	<0.023232
180309-c15	13	8.24183	1.78547	20.4993	20.9965	3.10414	<LOD	203.233	17.2103	<LOD	<LOD	14.0369	208.362	2.68919	17.614	2.7698	68.3407	3.92689	0.47922	1.29405	3.36525	13.879	1.85571	3.15779	2.18642	0.108633	0.122012	1.15837	0.477429	4.38177	0.263352	<0.0085266
180309-c16	14	8.9235	<LOD	23.1467	60.4005	5.09861	13.9986	297.059	47.2735	<LOD	<LOD	37.0974	546.177	6.1886	47.2508	5.0083	59.7007	10.9386	1.29971	3.18486	7.57607	16.0011	4.11618	9.00445	3.71275	0.421321	<0.57241	3.2623	1.23367	12.4803	0.593251	<0.068437
180309-c18	16	10.8118	2.03138	17.4321	32.4903	3.24782	30.6078	218.424	31.3133	<LOD	10.9423	26.8963	390.852	1.97109	35.0021	1.89011	49.1177	7.53587	0.933976	1.4433	4.52821	17.5708	1.63611	6.13931	2.60781	<0.04268	0.167175	2.02156	0.899046	8.92534	0.248223	0.0543232
180309-c19	17	12.3785	1.40942	18.7372	33.9837	<LOD	37.6053	225.069	28.7299	884.578	<LOD	22.6095	332.186	3.85756	27.6697	3.44552	59.5497	6.70437	0.745729	1.63749	4.14013	21.284	3.03137	5.36237	2.66563	0.114438	0.151204	1.84161	0.841141	7.8656	0.373052	<0.021926
180309-c20	18	8.15237	1.45156	17.1329	48.133	3.64029	16.0102	221.806	34.6805	<LOD	5.27061	27.5095	417.499	4.14395	34.3199	3.44718	43.4588	7.92693	0.984299	1.9589	5.94126	11.3527	3.00896	6.41786	2.62828	0.15762	0.219947	2.32555	0.984769	8.88679	0.414552	<0.041205
180309-c21	19	16.4628	2.80775	37.4864	61.0556	<LOD	45.3048	419.236	49.7739	<LOD	<LOD	38.279	586.849	6.81745	51.5221	5.20991	117.929	11.3692	1.56819	3.54234	8.45906	26.866	4.97184	9.2978	4.61097	0.313949	<0.80974	4.01317	1.38077	13.2986	0.701091	<0.070878
Limits of detection		Li	Be	B	Na	Mg	Al	Cl	K	Ca	Ti	Mn	Fe	Cu	Zn	As	Br	Rb	Sr	Ag	Cd	Sn	Sb	Cs	Ba	La	Ce	W	Tl	Pb	Bi	U
File	FI number	(µg/g)	(µg/g)	(µg/g)	(µg/g)	(µg/g)	(µg/g)	(µg/g)	(µg/g)	(µg/g)	(µg/g)	(µg/g)	(µg/g)	(µg/g)	(µg/g)	(µg/g)	(µg/g)	(µg/g)	(µg/g)	(µg/g)	(µg/g)	(µg/g)	(µg/g)	(µg/g)	(µg/g)	(µg/g)	(µg/g)	(µg/g)	(µg/g)	(µg/g)	(µg/g)	(µg/g)
180309-c03	1	3.57149	0.268991	19.5182	1.99451	3.43687	6.13154	164.787	5.02676	1027.8	3.44852	2.80769	53.2788	1.36427	7.57538	2.07026	60.7613	0.299866	0.175753	0.721102	2.99867	3.00486	1.00776	0.0234656	1.42193	0.139049	0.130239	0.0997913	0.0240308	0.196248	0.184184	0.0792689
180309-c03 - 2	2	9.53885	0.605204	52.1801	5.32776	8.95448	16.3758	440.774	13.4458	2743.73	8.98485	7.4949	141.555	3.58636	20.1578	5.47962	162.35	0.784663	0.453851	1.87877	7.81278	7.99131	2.66376	0.0527953	3.70473	0.359069	0.33632	0.224521	0.0540672	0.511307	0.484177	0.204698
180309-c04	3	2.1817	0.824199	12.1121	1.28977	2.27638	3.8214	104.154	3.10661	649.905	2.67949	1.78102	32.6528	0.610189	4.341	1.43371	37.8424	0.167876	0.119706	0.694925	0.456426	2.1002	0.494127	0.134532	0.944391	0.122032	0.114301	0.0903598	0.0217207	0.188399	0.0822922	0.0537866
180309-c04 - 2	4	2.02615	0.126598	11.3674	1.20584	2.00092	3.71739	99.8482	2.91474	620.705	1.49889	1.64511	25.2241	0.94024	3.34377	0.948542	37.5043	0.25868	0.13593	0.503741	1.7545	1.9994	0.625528	0.122685	0.619866	0.107265	0.10047	0.259371	0.0834944	0.18673	0.126804	0.00826171
180309-c05	5	7.70644	0.726029	43.1196	4.58294	8.09229	14.1345	378.203	11.0413	2362.87	6.19639	6.26439	97.6674	3.69579	12.9012	3.71985	142.43	1.01679	0.549739	2.0156	7.09573	7.67162	2.4378	0.485324	2.56252	0.433812	0.40633	1.07224	0.337676	0.736047	0.498428	0.0473801
180309-c06	6	2.25491	0.209794	13.0937	1.42479	1.74422	4.27211	112.255	3.38694	731.304	2.2881	1.75217	37.2841	0.816667	4.44355	1.39063	42.0887	0.199299	0.119038	0.0947731	2.01038	1.94267	0.760975	0.110171	0.725606	0.0240395	0.153001	0.397071	0.112489	0.0997566	0.0825406	0.0136714
180309-c07	7	3.41152	0.232379	18.679	1.95831	2.41956	6.38533	163.119	4.89234	1133.1	3.22579	2.61702	44.9468	1.03019	5.82614	1.59419	61.6928	0.179631	0.220561	0.924345	2.84905	3.13699	0.999411	0.0991995	1.00932	0.206083	0.162184	0.422247	0.0206735	0.184131	0.202334	0.0739754
180309-c08	8	7.34405	0.459878	40.8987	4.26453	6.95689	13.349	359.574	10.9985	2278.94	6.97463	5.99465	109.52	3.48764	11.6262	2.88249	136.045	0.387741	0.358546	2.0166	9.28579	7.2797	1.91175	0.387692	3.47225	0.447702	0.419349	0.910805	0.0408559	0.540423	0.252129	0.0298827
180309-c09	9	32.4441	2.51213	182.541	18.6745	30.6655	59.9006	1615.69	48.2116	10455.8	23.2972	25.7817	457.327	11.1174	60.5518	19.5844	593.753	2.29192	1.60842	6.58565	40.6075	34.2453	10.486	1.49777	9.74911	1.96506	2.29784	0.933834	1.28398	1.33252	1.91279	0.711779
180309-c10	10	7.27219	2.21812	40.9507	4.34259	0.503003	13.1489	354.439	10.789	2135.34	0.504076	5.8963	110.887	3.53449	11.6983	4.11223	129.372	0.739692	0.539075	1.0118	6.97143	7.24284	2.19489	0.265207	1.97232	0.253936	0.237858	0.0884806	0.0210789	0.565952	0.233183	0.0154162
180309-c13	11	8.43312	0.758989	47.2179	5.04679	11.9684	17.4735	416.566	13.0003	2891.56	14.7432	6.83085	130.059	3.24468	16.1757	4.1371	159.803	0.12046	0.672735	2.08794	7.37173	9.8885	2.39612	0.398599	3.44064	0.442658	0.489533	0.282367	0.261608	0.624399	0.434843	0.191322
180309-c14	12	3.89342	1.44823	20.9493	2.22465	4.7253	7.08533	180.382	5.64993	1245.81	4.00394	3.26434	58.8318	1.45021	7.54216	2.29432	68.9684	0.356731	0.331594	0.663866	0.687322	3.97926	0.901428	0.126436	1.28905	0.217322	0.155231	0.539005	0.0317678	0.229701	0.027519	0.0232319
180309-c15	13	2.47359	0.828973	13.3526	1.41443	2.81856	4.50306	115.174	3.60753	790.886	2.35636	2.07178	36.7221	0.872322	4.72529	1.41631	43.8931	0.212784	0.197791	0.379999	0.252262	2.50133	0.547867	0.0723726	0.737855	0.127896	0.0888549	0.308528	0.0116595	0.135182	0.0101	0.00852661
180309-c16	14	9.38747	1.06079	50.4934	5.18137	7.41752	16.68	441.022	13.9487	2977.77	14.9629	7.63263	160.999	2.60348	17.7766	5.68133	170.356	0.724693	0.888873	1.62319	8.73317	9.63954	2.97215	0.466379	0.944666	0.521223	0.572411	0.394966	0.311628	0.645113	0.458822	0.0684374
180309-c18	16	6.3965	2.11291	34.5313	3.60242	4.42705	12.3413	307.335	9.60433	2092.36	7.10481	5.02456	91.1044	2.43539	11.6731	3.66977	116.629	0.0594214	0.502591	1.30534	5.44694	6.52347	2.18675	0.247427	3.79859	0.0426804	0.0399792	0.138993	0.186148	0.464628	0.161247	0.0240396
180309-c19	17	6.05279	1.90838	33.4904	3.43057	0.711955	11.9017	303.553	9.49199	2200.43	3.98426	4.75404	98.6957	2.19504	11.9938	3.4035	113.885	0.408173	0.455707	1.60907	8.08099	5.71834	2.0313	0.223366	2.28099	0.349329	0.327225	0.953399	0.16766	0.229485	0.403088	0.0219258
180309-c20	18	5.96336	0.642357	31.6462	3.48979	4.6907	11.6462	287.685	9.14414	2019.09	6.08412	4.64528	92.5936	2.20558	10.8178	3.04009	106.646	0.102636	0.336965	1.35591	7.49434	5.88083	1.37134	0.337618	0.573205	0.257609	0.312777	0.840535	0.19773	0.41228	0.260919	0.0412049
180309-c21	19	14.4262	1.11132	72.7744	7.77801	13.1695	28.0221	677.839	21.1174	4738.05	17.673	11.1363	216.908	4.88235	23.5575	7.36908	259.349	1.21496	0.96412	2.26943	16.8085	13.2247	3.28794	0.557886	4.32782	0.978497	0.809741	1.80801	0.422253	1.12804	0.571995	0.0708785
